# Supplementary figures and images for: Highly stretchable and flexible supercapacitors based on electrospun PEDOT:SSEBS electrodes
Source: Royal Society of Chemistry journal article supplement (doi:10.1039/d2ta04476e), 2022-01-01

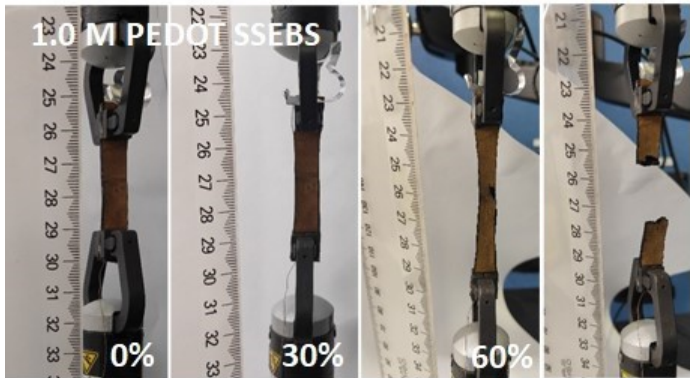

Supplement: d2ta04476e1.pdf [file d2ta04476e1.pdf]
